# Supplementary material
Source: Springer Nature journal article supplement (https://www.springermedizin.de/resource/supplementary/12887_2013_947_MOESM1_ESM.pdf/9476858)

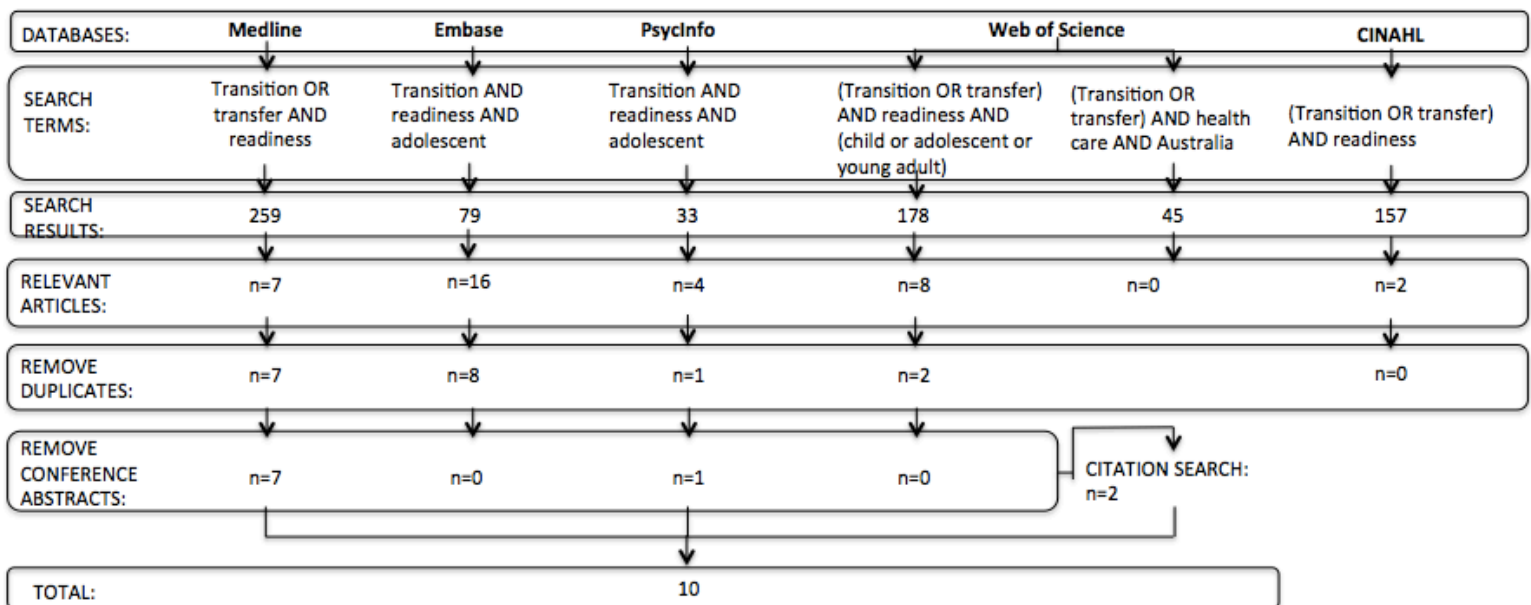

Supplement: MOESM1 [file 9476858]
